# Supplementary material
Source: ML conference proceedings conference paper supplement (https://proceedings.neurips.cc/paper_files/paper/2021/hash/31c0b36aef265d9221af80872ceb62f9-Abstract.html)
Supplement: Supplementary file [file 31c0b36aef265d9221af80872ceb62f9-Supplemental.pdf]

---

# Supplementary Material for “Contrastive Graph Poisson Networks: Semi-Supervised Learning with Extremely Limited Labels”

---

Sheng Wan<sup>1,2,3,\*</sup>, Yibing Zhan<sup>3</sup>, Liu Liu<sup>4</sup>, Baosheng Yu<sup>4</sup>, Shirui Pan<sup>5</sup>, Chen Gong<sup>1,2,3,†</sup>

<sup>1</sup>PCA Lab, Key Lab of Intelligent Perception and Systems for High-Dimensional Information of Ministry of Education

<sup>2</sup>Jiangsu Key Lab of Image and Video Understanding for Social Security, School of Computer Science and Engineering, Nanjing University of Science and Technology

<sup>3</sup>JD Explore Academy <sup>4</sup>The University of Sydney

<sup>5</sup>Department of Data Science and AI, Faculty of IT, Monash University  
wansheng315@hotmail.com, zhanyibing@jd.com,  
{liu.liu1, baosheng.yu}@sydney.edu.au,  
shirui.pan@monash.edu, chen.gong@njust.edu.cn

## 1 Implementation details

All experiments were conducted on a Linux server with a Tesla P40 GPU. Our Contrastive Graph Poisson Network (CGPN) was implemented via PyTorch 1.4.0 [1]. We adopted the Adam optimizer [2] for training. The graph attention networks (GATs) of CGPN-GAT only utilized a single-head attention mechanism for simplicity. The number of GAT layers was set as two. Other hyperparameters were adjusted based on the corresponding datasets. Tables 1, 2, 3, and 4 provide the details of the important hyperparameters.

Table 1: Parameter settings on Cora dataset

| # Labels per class | $\lambda_1$ | $\lambda_2$ | Learning rate | Training epochs | Hidden units | Dropout rate |
|--------------------|-------------|-------------|---------------|-----------------|--------------|--------------|
| 1                  | 0.9         | 1.3         | 0.1           | 500             | 128          | 0.8          |
| 2                  | 0.1         | 2.0         | 0.1           | 1500            | 64           | 0.8          |
| 3                  | 0.6         | 1.5         | 0.1           | 1500            | 64           | 0.8          |
| 4                  | 0.6         | 1.5         | 0.1           | 1500            | 64           | 0.8          |
| 5                  | 0.1         | 0.9         | 0.1           | 1500            | 64           | 0.8          |

Table 2: Parameter settings on CiteSeer dataset

| # Labels per class | $\lambda_1$ | $\lambda_2$ | Learning rate | Training epochs | Hidden units | Dropout rate |
|--------------------|-------------|-------------|---------------|-----------------|--------------|--------------|
| 1                  | 0.5         | 1.1         | 0.0001        | 2000            | 512          | 0.8          |
| 2                  | 1.6         | 1.1         | 0.0001        | 2000            | 512          | 0.8          |
| 3                  | 1.1         | 0.5         | 0.0001        | 2000            | 512          | 0.8          |
| 4                  | 1.1         | 0.5         | 0.0001        | 2000            | 512          | 0.8          |
| 5                  | 0.3         | 0.5         | 0.0001        | 2000            | 512          | 0.7          |

---

\*This work was done when Sheng was a research intern at JD Explore Academy.

†C. Gong is the corresponding author.

Table 3: Parameter settings on PubMed dataset

| # Labels per class | $\lambda_1$ | $\lambda_2$ | Learning rate | Training epochs | Hidden units | Dropout rate |
|--------------------|-------------|-------------|---------------|-----------------|--------------|--------------|
| 1                  | 1.0         | 1.0         | 0.01          | 500             | 64           | 0.4          |
| 2                  | 1.0         | 1.0         | 0.01          | 500             | 64           | 0.4          |
| 3                  | 0.1         | 1.0         | 0.1           | 1000            | 64           | 0.4          |
| 4                  | 1.0         | 1.0         | 0.1           | 1000            | 64           | 0.4          |
| 5                  | 1.0         | 1.0         | 0.1           | 1000            | 64           | 0.4          |

Table 4: Parameter settings on Amazon Photo dataset

| # Labels per class | $\lambda_1$ | $\lambda_2$ | Learning rate | Training epochs | Hidden units | Dropout rate |
|--------------------|-------------|-------------|---------------|-----------------|--------------|--------------|
| 1                  | 0.1         | 0.5         | 0.1           | 500             | 64           | 0.2          |
| 2                  | 0.1         | 0.5         | 0.1           | 1000            | 128          | 0.0          |
| 3                  | 0.7         | 0.5         | 0.1           | 1000            | 512          | 0.6          |
| 4                  | 0.7         | 0.5         | 0.1           | 1000            | 512          | 0.6          |
| 5                  | 0.7         | 0.5         | 0.1           | 1000            | 512          | 0.8          |

## 2 More performance comparison

We report the classification results of our CGPN framework and the baseline methods on the four datasets when five labels per class are available for training. The statistics are listed in Table 5, where the highest record at each label rate is highlighted in bold. We can observe that CGPN still outperforms the baseline methods. The performance margin between CGPN and other competitors demonstrates the good capability of our proposed framework in semi-supervised learning with very limited labels.

In addition, the impact of the number of labeled nodes on classification performance has been exhibited in Figure 1. We can observe that the performance of all the methods would be improved with the increase of labeled data. Intuitively, CGPN could significantly improve the performance of GCN and GAT when labeled data are extremely limited. Nevertheless, the improvements achieved by CGPN are gradually shrinking as the number of labeled data increases. In particular, when there are ten labeled data per class, the performance of all methods becomes similar. Therefore, one of our future works is to enhance CGPN so that it could still significantly improve the performance of GCN or GAT when labeled data are sufficient.

## 3 Detailed descriptions of all baselines

In this paper, six baselines are used for comparison to evaluate the performance of our CGPN at limited label rates. Except for MLP, the remaining baselines are GNN-based models, and the detailed descriptions of these models are presented as follows:

- (1) GCN [3]: As one of the most classic GNN models, it defines the graph convolution in the spectral domain and uses the first-order approximation to reduce the number of parameters.
- (2) GAT [4]: It defines the graph convolution in the spatial domain by introducing the attention mechanism to assign different weights to the neighboring nodes when aggregating information.
- (3) BGCN [5]: It views the observed graph as a realization from a parametric family of random graphs and targets inference of the joint posterior of random graph parameters and node labels.
- (4) MVGRL [6]: It learns node and graph level representations by contrasting encodings from first-order neighbors and a graph diffusion.
- (5) GPRGNN [7]: It aims to jointly optimize node features and graph topological information extraction by adaptively learning the Generalized PageRank weights.

Table 5: Classification accuracy of different methods with five labels per class

| Dataset    | Cora              | CiteSeer          | PubMed            | Photo             |
|------------|-------------------|-------------------|-------------------|-------------------|
| MLP        | 41.58±4.11        | 40.33±5.38        | 60.36±3.50        | 55.63±4.29        |
| GCN [3]    | 71.35±1.85        | 56.89±3.67        | 70.57±6.59        | 84.07±2.57        |
| GAT [4]    | 72.40±2.45        | 61.31±2.29        | 70.86±4.63        | 82.88±2.71        |
| BGCN [5]   | 74.54±2.58        | 61.25±5.06        | 70.18±5.72        | 79.91±4.74        |
| MVGRL [6]  | 75.19±2.85        | 63.94±2.15        | 68.15±3.86        | 77.52±3.01        |
| GPRGNN [7] | 74.56±1.22        | 60.03±1.58        | 70.27±1.92        | 84.82±1.49        |
| APPNP [8]  | 72.24±6.10        | 64.25±4.77        | 70.87±5.82        | 81.78±3.07        |
| CGPN-GCN   | <b>75.83±1.69</b> | 65.00±2.59        | <b>71.20±4.05</b> | 84.77±1.90        |
| CGPN-GAT   | 75.65±1.36        | <b>65.65±2.77</b> | 71.04±4.27        | <b>85.53±1.79</b> |

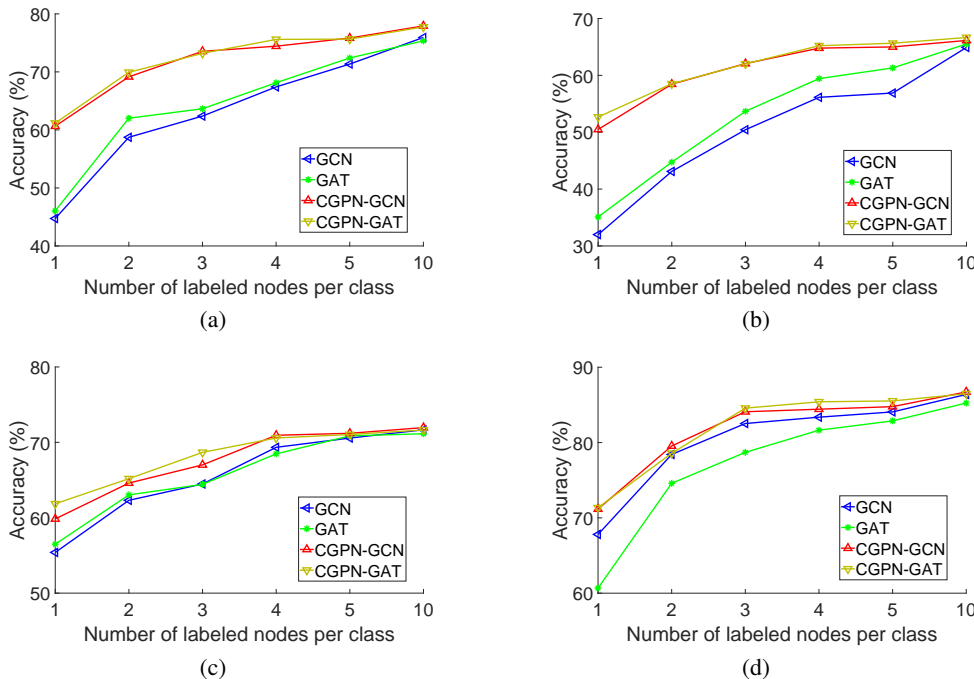

Figure 1: Classification performance with different numbers of labeled nodes. (a) Cora dataset; (b) CiteSeer dataset; (c) PubMed dataset; (d) Amazon Photo dataset.

## References

- [1] Adam Paszke, Sam Gross, Soumith Chintala, Gregory Chanan, Edward Yang, Zachary DeVito, Zeming Lin, Alban Desmaison, Luca Antiga, and Adam Lerer. Automatic differentiation in PyTorch. In *NIPS 2017 Autodiff workshop*, 2017.
- [2] Diederik P Kingma and Jimmy Ba. Adam: A method for stochastic optimization. *arXiv preprint arXiv:1412.6980*, 2014.
- [3] Thomas N. Kipf and Max Welling. Semi-supervised classification with graph convolutional networks. In *International Conference on Learning Representations*, 2017.
- [4] Petar Veličković, Guillem Cucurull, Arantxa Casanova, Adriana Romero, Pietro Lio, and Yoshua Bengio. Graph attention networks. *arXiv preprint arXiv:1710.10903*, 2017.
- [5] Yingxue Zhang, Soumyasundar Pal, Mark Coates, and Deniz Ustebay. Bayesian graph convolutional neural networks for semi-supervised classification. In *Proceedings of the AAAI Conference on Artificial Intelligence*, volume 33, pages 5829–5836, 2019.

- [6] Kaveh Hassani and Amir Hosein Khasahmadi. Contrastive multi-view representation learning on graphs. In *International Conference on Machine Learning*, pages 4116–4126, 2020.
- [7] Eli Chien, Jianhao Peng, Pan Li, and Olgica Milenkovic. Adaptive universal generalized PageRank graph neural network. In *International Conference on Learning Representations*, 2021.
- [8] Johannes Klicpera, Aleksandar Bojchevski, and Stephan Günnemann. Predict then propagate: Graph neural networks meet personalized PageRank. In *International Conference on Learning Representations*, 2018.
